# Supplementary material for: The Impact of Non-Concentrated Storage on the Centrifugation Yield of Microchloropsis gaditana: A Pilot-Scale Study
Source: Life (Basel). 2024 Jan 17;14(1):131. doi: 10.3390/life14010131 (PMC10821389; doi:10.3390/life14010131)
Supplement: Supplementary file 1 [file life-14-00131-s001.zip › life-2705324-supplementary.pdf]

# The impact of non-concentrated storage on the centrifugation yield of *Microchloropsis gaditana*: A pilot-scale study

Joran Verspreet<sup>1,\*</sup>, Floris Schoeters<sup>2</sup>, and Leen Bastiaens<sup>1</sup>

<sup>1</sup> Flemish Institute for Technological Research (VITO), Boeretang 200, 2400 Mol

<sup>2</sup> Radius, Thomas More University of Applied Sciences, Geel, Belgium

## Supplementary information

### Supplementary Figure S1

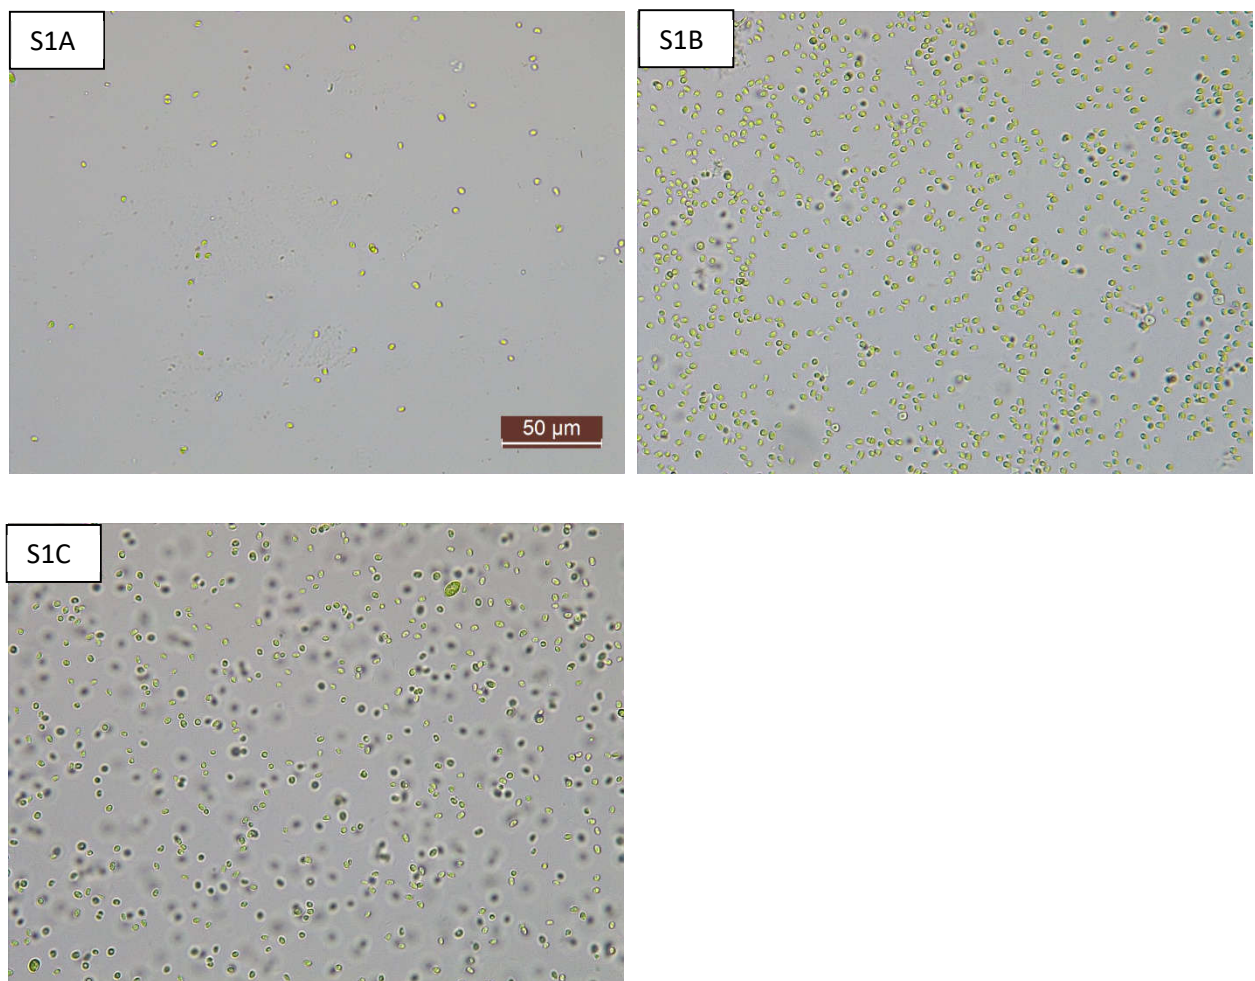

**Supplementary Figure S1.** *N. gaditana* batch 1, one day before the start of the storage test (S1A), *N. gaditana* batch 2, two days before the start of the storage test (S1B), and *N. gaditana* batch 3, one day before the start of the storage test (S1C). Note that these pictures do not give a representative view of cell concentrations. The reader is referred to Table 1 (showing initial organic matter levels) to assess the algae concentrations in the different batches.

## Supplementary Figure S2

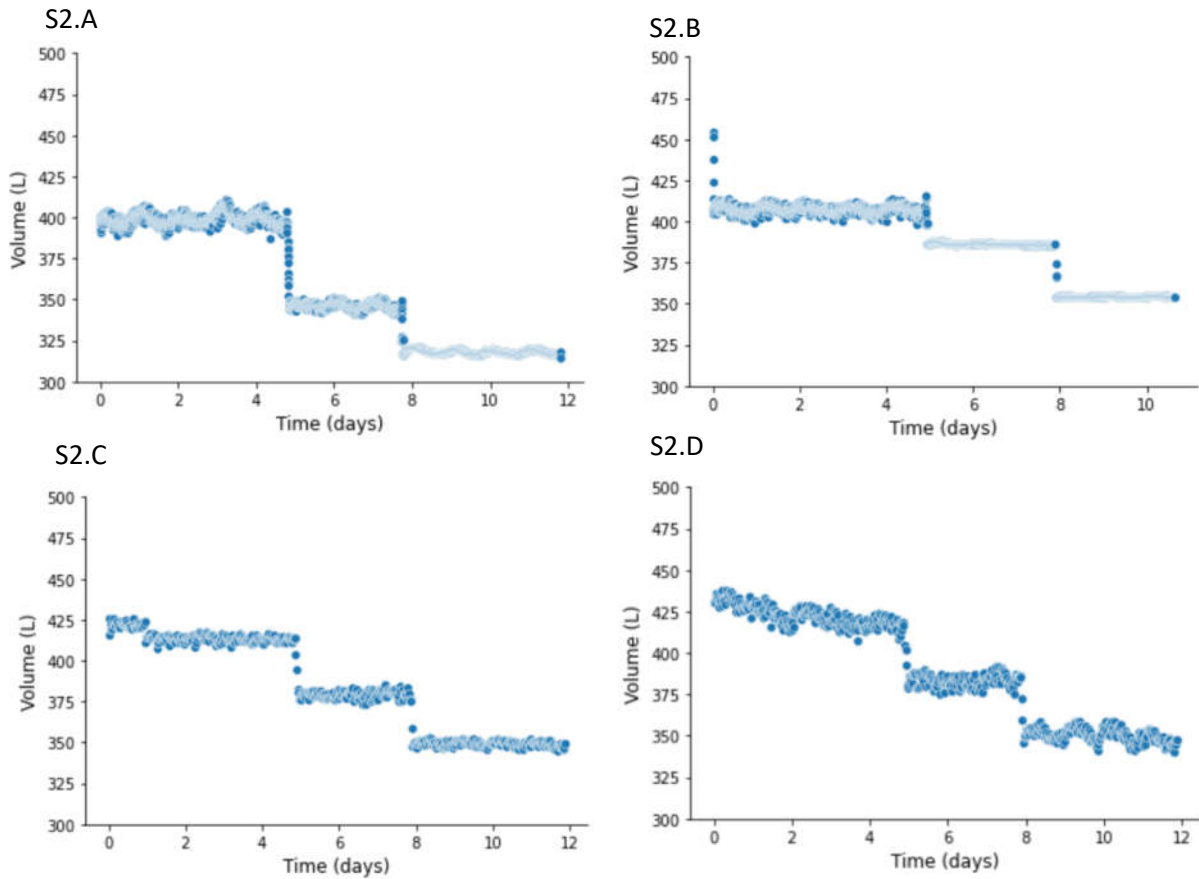

**Supplementary Figure S2.** Volume profiles for pilot preservation tests with algae batch 1 and target temperature at 8°C (S2.A), algae batch 2 and target temperature at 20°C (S2.B), algae batch 3 and target temperature at 8°C (S2.C), and algae batch 3 and no temperature control (S2.D).

**Supplementary Figure S3**

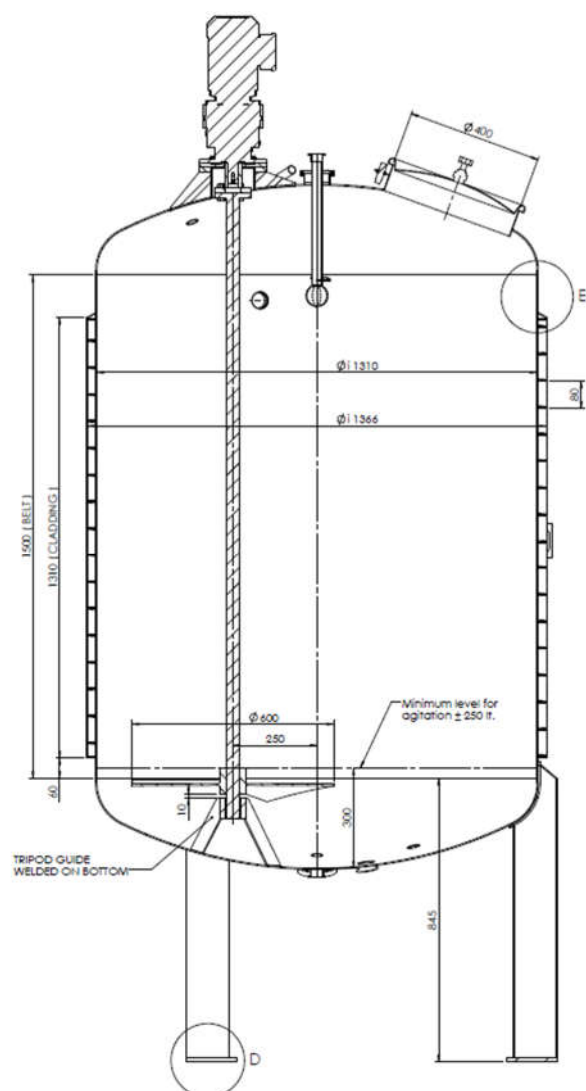

**Supplementary Figure S3.** Storage tank dimensions and geometry.

#### Supplementary Figure S4

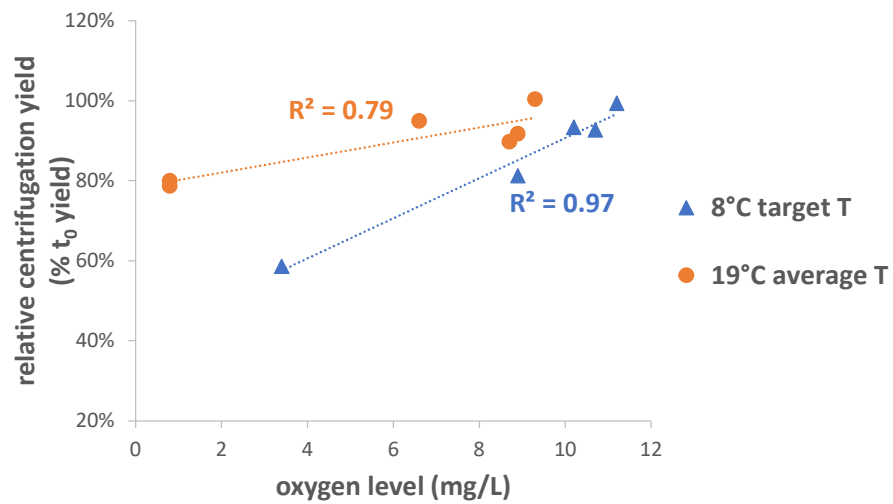

**Supplementary FigureS 4.** Relative centrifugation yields of stored algae cultures in function of  $O_2$  levels in the storage tanks. Due to practical limitations, the  $O_2$  levels were measured at the top layer of the algae suspension, and are probably higher than those at the bottom layers.

**Supplementary Table S1.** Centrifugation yields during pilot-scale preservation. Lowercase letters (a, b, c) denote significant differences; values within one column and within one storage test that are not denoted by a common letter, are significantly different.

| Storage time (days)                  | Centrifugation yield (g org matter pellet/L culture) | Relative centrifugation yield (% t <sub>0</sub> yield) | Storage time (days)                    | Centrifugation yield (g org matter pellet/L culture) | Relative centrifugation yield (% t <sub>0</sub> yield) |
|--------------------------------------|------------------------------------------------------|--------------------------------------------------------|----------------------------------------|------------------------------------------------------|--------------------------------------------------------|
| <b>8°C target T - algae batch 1*</b> |                                                      |                                                        | <b>19°C average T - algae batch 2*</b> |                                                      |                                                        |
| 0                                    | 0.66 ± 0.04 (a)                                      | 100.0 ± 7.9% (a)                                       | 0                                      | 0.70 ± 0.01 (a)                                      | 100.0 ± 2.8% (a)                                       |
| 5                                    | 0.53 ± 0.04 (b)                                      | 79.9 ± 7.1% (b)                                        | 5                                      | 0.67 ± 0.02 (b)                                      | 94.7 ± 2.9% (b)                                        |
| 8                                    | 0.51 ± 0.02 (b)                                      | 77.6 ± 5.0% (b)                                        | 8                                      | 0.56 ± 0.02 (c)                                      | 79.5 ± 3.7% (c)                                        |
| 12                                   | 0.38 ± 0.02 (c)                                      | 57.3 ± 4.3% (c)                                        | 12                                     | 0.55 ± 0.02 (c)                                      | 78.3 ± 2.8% (c)                                        |
| <b>8°C target T - algae batch 3*</b> |                                                      |                                                        | <b>19°C average T - algae batch 3*</b> |                                                      |                                                        |
| 0                                    | 0.66 ± 0.01 (a)                                      | 100.0 ± 2.2% (a)                                       | 0                                      | 0.66 ± 0.01 (a)                                      | 100.0 ± 2.2% (a)                                       |
| 5                                    | 0.65 ± 0.02 (a)                                      | 99.3 ± 3.2% (a)                                        | 5                                      | 0.65 ± 0.02 (a)                                      | 99.3 ± 3.5% (a)                                        |
| 8                                    | 0.61 ± 0.02 (b)                                      | 93.4 ± 4.0% (b)                                        | 8                                      | 0.58 ± 0.01 (b)                                      | 88.9 ± 2.1% (b)                                        |
| 12                                   | 0.61 ± 0.02 (b)                                      | 92.5 ± 3.1% (b)                                        | 12                                     | 0.60 ± 0.01 (b)                                      | 91.0 ± 2.3% (b)                                        |

\*Figure 1 in the main text illustrates algae suspension temperature during storage in detail.

**Supplementary Table S2.** O<sub>2</sub> levels in the algae suspensions of the first two storage tests. Due to practical limitations, the O<sub>2</sub> levels were measured at the top layer of the algae suspension, and are probably higher than those at the bottom layers.

| Storage time (days)                 | O <sub>2</sub> levels (mg/L) | Storage time (days)                    | O <sub>2</sub> levels (mg/L) |
|-------------------------------------|------------------------------|----------------------------------------|------------------------------|
| <b>8°C target T - algae batch 1</b> |                              | <b>19°C average T - algae batch 2*</b> |                              |
| 0                                   | 4.9 ± 0.1                    | 0                                      | not measured                 |
| 5                                   | 8.9 ± 0.1                    | 5                                      | 6.7 ± 0.1                    |
| 8                                   | not measured                 | 8                                      | 0.9 ± 0.1                    |
| 12                                  | 3.4 ± 0.1                    | 12                                     | 0.9 ± 0.1                    |
